# Supplementary material for: Left-right side-specific endocrine signaling complements neural pathways to mediate acute asymmetric effects of brain injury
Source: eLife. 2021 Aug 10;10:e65247. doi: 10.7554/eLife.65247 (PMC8354641; doi:10.7554/eLife.65247)
Supplement: Figure 1—source data 1. [file elife-65247-fig1-data1.xlsx]

## Sheet: Figure 1. Exptl. design
Figure 1_Source data 1.
Hindlimb postural asymmetry induced by the unilateral ablation of the hindlimb representation area of sensorimotor cortex in rats with intact and completely transected spinal cord.
Figure 1G,H. HL-PA 3 h after left UBI or left sham surgery.
Figure 1D,E. HL-PA 3 h after left UBI or right UBI, and left or right sham surgery, all performed after complete spinal cord transection.
Negative and positive HL-PA values are assigned to rats with the left and right hindlimb flexion, respectively.

## Sheet: Figure 1D,E
Rat No	Operation	Operation Side	HL-PA, mm; 3 h after UBI
HE001	Sham	Left	-0.75
HE002	Sham	Left	0.67
HE003	Sham	Left	-0.33
HE004	Sham	Left	-0.08
HE014	Sham	Right	-0.42
HE015	Sham	Right	-0.25
HE016	Sham	Right	-0.5
HE017	Sham	Right	0
HE005	UBI	Left	4.42
HE006	UBI	Left	1.67
HE007	UBI	Left	2.58
HE008	UBI	Left	2.42
HE009	UBI	Left	3.75
HE010	UBI	Left	3.75
HE011	UBI	Left	3
HE012	UBI	Left	4.08
HE013	UBI	Left	3.25
HE018	UBI	Right	-4.67
HE019	UBI	Right	-1.42
HE020	UBI	Right	-3.83
HE021	UBI	Right	-4.67
HE022	UBI	Right	-5.08
HE023	UBI	Right	-3.92
HE024	UBI	Right	-4.75
HE025	UBI	Right	-7.5
HE026	UBI	Right	-3.67

## Sheet: Figure 1G,H
Rat No	Operation	Operation Side	HL-PA, mm; before UBI	HL-PA, mm; 3 h after UBI
115	Sham	Left	-0.166667	0.0833333
116	Sham	Left	-0.166667	0.166667
117	Sham	Left	-0.166667	0.166667
118	Sham	Left	0.0833333	0.166667
119	Sham	Left	-0.0833333	0
120	Sham	Left	-0.0833333	0.0833333
121	Sham	Left	-0.166667	0.0833333
122	UBI	Left	0.166667	9.83333
123	UBI	Left	-0.166667	10.6667
124	UBI	Left	-0.416667	5
125	UBI	Left	0.166667	7
126	UBI	Left	-0.0833333	6.41667
127	UBI	Left	0	12.25
128	UBI	Left	-0.166667	5.25
129	UBI	Left	0.25	7.33333
