# Supplementary material for: Left-right side-specific endocrine signaling complements neural pathways to mediate acute asymmetric effects of brain injury
Source: eLife. 2021 Aug 10;10:e65247. doi: 10.7554/eLife.65247 (PMC8354641; doi:10.7554/eLife.65247)
Supplement: Figure 2—source data 1. [file elife-65247-fig2-data1.xlsx]

## Sheet: Design
Figure 2. Source data 1.
Hindlimb nociceptive withdrawal reflexes in rats exposed to UBI or sham surgery after complete spinal cord transection.
EMG activity: The current threshold and the number of spikes of left and right extensor digitorum longus (EDL), interosseous (Int), peroneus longus (PL) and semitendinosus (ST) muscles were registered after electrical stimulation of symmetric paw sites.

## Sheet: Figure 2C,D
Rat No	Operation	Operation Side	Muscle	Hindlimb Side	Stimulation Location	Threshold	Recording Current	Total Spikes 0.2-1s
16	Sham	Left	EDL	Left	D5	9	20	54
16	Sham	Left	EDL	Right	D5	10	20	91
16	Sham	Left	Int	Left	D2	20	20	514
16	Sham	Left	Int	Right	D2	7	20	830
16	Sham	Left	PL	Left	D5	7	20	278
16	Sham	Left	PL	Right	D5	12	20	159
17	Sham	Left	EDL	Left	D4	12	30	103
17	Sham	Left	EDL	Right	D4	15	30	248
17	Sham	Left	PL	Left	D5	4	12	211
17	Sham	Left	PL	Right	D5	7	12	128
17	Sham	Left	ST	Left	Heel	15	20	21
17	Sham	Left	ST	Right	Heel	9	20	261
18	Sham	Right	EDL	Left	D4	7	15	82
18	Sham	Right	EDL	Left	D5	4	12	52
18	Sham	Right	EDL	Right	D4	3	15	51
18	Sham	Right	EDL	Right	D5	3	12	115
18	Sham	Right	Int	Left	D3	12	15	214
18	Sham	Right	Int	Right	D3	3	15	447
18	Sham	Right	PL	Left	D5	9	12	38
18	Sham	Right	PL	Right	D5	3	12	32
19	Sham	Left	EDL	Left	D4	7	12	259
19	Sham	Left	EDL	Left	D5	3	12	274
19	Sham	Left	EDL	Right	D4	1	12	341
19	Sham	Left	EDL	Right	D5	1	12	205
19	Sham	Left	Int	Left	D2	7	15	318
19	Sham	Left	Int	Right	D2	3	15	595
19	Sham	Left	PL	Left	D5	3	12	154
19	Sham	Left	PL	Right	D5	1	12	403
19	Sham	Left	ST	Left	Heel	12	35	1023
19	Sham	Left	ST	Right	Heel	30	35	748
20	Sham	Left	EDL	Left	D4	3	20	46
20	Sham	Left	EDL	Right	D4	5	20	44
20	Sham	Left	Int	Left	D2	3	5	218
20	Sham	Left	Int	Right	D2	5	5	620
20	Sham	Left	PL	Left	D5	3	9	67
20	Sham	Left	PL	Right	D5	3	9	91
21	Sham	Left	Int	Left	D2	2	5	250
21	Sham	Left	Int	Right	D2	2	5	801
21	Sham	Left	PL	Left	D5	5	15	67
21	Sham	Left	PL	Right	D5	7	15	84
21	Sham	Left	ST	Left	Heel	5	20	354
21	Sham	Left	ST	Right	Heel	3	20	339
22	Sham	Right	EDL	Left	D5	1	15	12
22	Sham	Right	EDL	Right	D5	0.2	15	182
22	Sham	Right	Int	Left	D2	1	5	806
22	Sham	Right	Int	Right	D2	2	5	3341
22	Sham	Right	PL	Left	D5	1	15	60
22	Sham	Right	PL	Right	D5	2	15	180
22	Sham	Right	ST	Left	Heel	1	15	379
22	Sham	Right	ST	Right	Heel	3	15	197
23	Sham	Right	BP	Left	Heel	9	20	487
23	Sham	Right	BP	Right	Heel	5	20	518
23	Sham	Right	EDL	Left	D4	1	7	22
23	Sham	Right	EDL	Right	D4	1	7	502
23	Sham	Right	Int	Left	D4	5	9	1475
23	Sham	Right	Int	Right	D4	7	9	418
23	Sham	Right	PL	Left	D5	10	30	163
23	Sham	Right	PL	Right	D5	10	30	136
25	Sham	Right	EDL	Left	D4	0.5	7	515
25	Sham	Right	EDL	Right	D4	2	7	356
25	Sham	Right	Int	Left	D2	1	2	1143
25	Sham	Right	Int	Right	D2	0.5	2	1198
25	Sham	Right	PL	Left	D5	3	15	167
25	Sham	Right	PL	Right	D5	3	15	104
25	Sham	Right	ST	Left	Heel	12	30	140
25	Sham	Right	ST	Right	Heel	3	30	744
26	Sham	Right	EDL	Left	D5	2	9	869
26	Sham	Right	EDL	Right	D5	0.5	9	980
26	Sham	Right	Int	Left	D3	0.5	7	1113
26	Sham	Right	Int	Right	D3	2	7	742
26	Sham	Right	PL	Left	D5	2	9	289
26	Sham	Right	PL	Right	D5	0.5	9	262
26	Sham	Right	PL	Left	D5	0.5	15	87
26	Sham	Right	PL	Right	D5	0.5	15	89
26	Sham	Right	ST	Left	Heel	15	25	30
26	Sham	Right	ST	Right	Heel	7	25	147
31	Sham	Left	EDL	Left	D5	0.3	3	250
31	Sham	Left	EDL	Right	D5	3	3	84
31	Sham	Left	ST	Left	Heel	20	25	374
31	Sham	Left	ST	Right	Heel	15	25	246
144	UBI	Right	Int	Left	D4	20	20	7
144	UBI	Right	Int	Right	D4	9	20	963
145	UBI	Right	Int	Left	D3	5	30	287
145	UBI	Right	Int	Right	D3	5	30	299
145	UBI	Right	PL	Left	D5	12	40	118
145	UBI	Right	PL	Right	D5	12	40	188
146	UBI	Left	Int	Left	D2	4	5	150
146	UBI	Left	Int	Right	D2	1	5	1249
147	UBI	Left	Int	Left	D2	15	30	5
147	UBI	Left	Int	Right	D2	15	30	86
147	UBI	Left	PL	Left	D5	30	45	16
147	UBI	Left	PL	Right	D5	12	45	257
148	UBI	Left	EDL	Left	D4	3	7	84
148	UBI	Left	EDL	Right	D4	0.3	7	974
148	UBI	Left	Int	Left	D2	4	7	473
148	UBI	Left	Int	Right	D2	0.3	7	839
148	UBI	Left	PL	Left	D5	20	35	160
148	UBI	Left	PL	Right	D5	0.5	35	323
149	UBI	Left	EDL	Left	D4	10	40	132
149	UBI	Left	EDL	Right	D4	17	40	505
149	UBI	Left	Int	Left	D3	10	20	92
149	UBI	Left	Int	Right	D3	2	20	825
149	UBI	Left	PL	Left	D5	35	50	88
149	UBI	Left	PL	Right	D5	12	50	68
149	UBI	Left	ST	Left	Heel	10	13	49
149	UBI	Left	ST	Right	Heel	10	13	81
150	UBI	Right	EDL	Left	D4	20	25	146
150	UBI	Right	EDL	Right	D4	0.5	25	88
150	UBI	Right	Int	Left	D2	1.3	2	271
150	UBI	Right	Int	Right	D2	0.5	2	968
150	UBI	Right	PL	Left	D5	0.7	30	335
150	UBI	Right	PL	Right	D5	17	30	18
151	UBI	Right	EDL	Left	D5	13	20	145
151	UBI	Right	EDL	Right	D5	7	20	213
151	UBI	Right	ST	Left	Heel	3	40	1205
151	UBI	Right	ST	Right	Heel	17	40	746
66	UBI	Left	Int	Left	D3	3	5	906
66	UBI	Left	Int	Right	D3	7	5	273
67	UBI	Left	Int	Left	D3	5	10	737
67	UBI	Left	Int	Right	D3	1	10	2952
67	UBI	Left	ST	Left	Heel	8	20	136
67	UBI	Left	ST	Right	Heel	8	20	563
68	UBI	Left	Int	Left	D3	0.2	3	1071
68	UBI	Left	Int	Left	D4	7	15	349
68	UBI	Left	Int	Right	D3	2	3	570
68	UBI	Left	Int	Right	D4	9	15	459
68	UBI	Left	ST	Left	Heel	25	25	274
68	UBI	Left	ST	Right	Heel	5	25	1270
69	UBI	Left	Int	Left	D4	1	5	1184
69	UBI	Left	Int	Right	D4	3	5	969
71	UBI	Right	EDL	Left	D5	15	15	29
71	UBI	Right	EDL	Right	D5	7	15	20
71	UBI	Right	Int	Left	D2	9	15	179
71	UBI	Right	Int	Right	D2	3	15	2060
71	UBI	Right	PL	Left	D5	15	15	14
71	UBI	Right	PL	Right	D5	3	15	76
71	UBI	Right	ST	Left	Heel	5	20	62
71	UBI	Right	ST	Right	Heel	9	20	10
73	UBI	Right	Int	Left	D4	15	20	1174
73	UBI	Right	Int	Right	D4	2	20	400
73	UBI	Right	PL	Left	Heel	35	50	182
73	UBI	Right	PL	Right	Heel	40	50	22
74	UBI	Right	EDL	Left	D5	15	50	244
74	UBI	Right	EDL	Right	D5	15	50	76
74	UBI	Right	Int	Left	D2	20	30	18
74	UBI	Right	Int	Right	D2	25	30	173
74	UBI	Right	PL	Left	D5	35	50	30
74	UBI	Right	PL	Right	D5	50	50	11
74	UBI	Right	ST	Left	Heel	4	40	530
74	UBI	Right	ST	Right	Heel	40	40	3
76	UBI	Right	EDL	Left	D5	2	30	323
76	UBI	Right	EDL	Right	D5	9	30	4
76	UBI	Right	Int	Left	D4	9	15	73
76	UBI	Right	Int	Left	D5	12	30	32
76	UBI	Right	Int	Right	D4	3	15	756
76	UBI	Right	Int	Right	D5	3	30	409
76	UBI	Right	PL	Left	D5	2	30	135
76	UBI	Right	PL	Right	D5	12	30	2
77	UBI	Left	Int	Left	D3	1.5	5	1236
77	UBI	Left	Int	Right	D3	3	5	648
77	UBI	Left	PL	Left	D5	1	5	285
77	UBI	Left	PL	Right	D5	2	5	12
77	UBI	Left	ST	Left	Heel	9	9	234
77	UBI	Left	ST	Right	Heel	1	9	1358
79	UBI	Right	BP	Left	Heel	15	20	46
79	UBI	Right	BP	Right	Heel	15	20	19
79	UBI	Right	EDL	Left	D4	2	7	286
79	UBI	Right	EDL	Left	D5	30	30	175
79	UBI	Right	EDL	Right	D4	2	7	272
79	UBI	Right	EDL	Right	D5	20	30	248
79	UBI	Right	Int	Left	D4	5	7	122
79	UBI	Right	Int	Right	D4	3	7	804
79	UBI	Right	PL	Left	D5	20	30	62
79	UBI	Right	PL	Right	D5	9	30	75
