# Supplementary material for: Left-right side-specific endocrine signaling complements neural pathways to mediate acute asymmetric effects of brain injury
Source: eLife. 2021 Aug 10;10:e65247. doi: 10.7554/eLife.65247 (PMC8354641; doi:10.7554/eLife.65247)
Supplement: Figure 3—source data 1. [file elife-65247-fig3-data1.xlsx]

## Sheet: Figure 3_Source Data 1
Raw data for the expression of neuroplasticity and neuropeptide genes in the lumbar domains of rats exposed to the left unilateral brain injury (UBI) or left sham surgery (sham).
mRNA levels were normalized to geometric mean of expression levels of two control genes Actb and Gapdh.
Rat ID	Operation type	Spinal cord side	Tgfb	Gap43	Arc	Dlg4	GluR1	Grin2a	Grin2b	Nfkbia	Syt4	Bdnf	cFos	Egr1	Homer1	Oprk1	Oprd1	Oprm1	Pdyn	Penk	Pcsk6	Avpr1a
1	UBI	Left	1.1457	1.00796	0.39378	0.97037	0.83369	1.02379	1.09074	1.67267	1.05196	0.68566	0.121	0.29942	0.87749	0.81969	0.87249	0.83622	0.58347	0.78361	1.0215	0.75479
2	UBI	Left	0.96241	1.12604	0.60419	0.9373	1.05256	1.1144	1.35934	1.35652	1.17724	1.32594	0.14271	0.30912	0.9285	1.18756	0.73218	0.97893	0.82449	1.53799	0.72743	0.62998
3	UBI	Left	0.94567	1.04441	0.70944	1.13959	1.13959	1.13959	1.13959	0.77546	1.03953	0.83694	0.08665	0.26774	0.92696	1.09869	0.87087	0.84275	1.13959	1.13959	1.02242	0.80097
4	UBI	Left	1.09357	1.07436	0.8541	0.93972	0.66476	1.02117	1.07726	0.78783	0.99224	1.02772	0.15416	0.37509	0.85723	1.11031	0.72461	0.81277	0.56004	0.85152	0.85232	0.71053
5	UBI	Left	0.88522	1.26873	1.01488	1.19012	0.93043	1.06484	1.12304	0.96994	1.26873	1.26428	0.22003	0.42272	1.26873	1.00998	1.26873	1.26873	0.65123	0.87035	1.06268	0.7954
6	UBI	Left	1.00012	0.97804		0.90025	0.89265	0.92199	0.93245	0.60896	1.01173	0.97533		0.28275	1.04848	1.19442	0.64279	0.74243	0.69563	1.13603	1.05894	0.69512
7	UBI	Left	1.10136	0.949	0.606	0.91823	0.86085	0.76469	0.91141	0.61547	1.00363	0.93422	0.09666	0.24009	1.06352	1.01995	0.71597	0.85224	0.54587	1.14008	1.40518	1.09418
8	UBI	Left	0.80194	1.01605		0.97608	0.86564	1.19959	1.21302	0.48739	1.05743	1.21654	0.10577	0.28344	1.07266	1.14131	0.73982	0.82623	0.73763	1.1347	0.77676	0.74489
9	UBI	Left	1.13552	0.95673	0.4677	0.90978	0.79936	0.74713	0.85537	0.68941	0.91969	0.85373	0.07909	0.23666	0.72288	0.98129	0.67694	0.75581	0.66139	1.07195	1.03407	0.88173
10	UBI	Left	1.26849	0.87719	0.58857	0.95757	0.66396	1.0885	1.13725	1.11758	0.90701	0.91801		0.29473	0.98606	0.98363	0.76062	0.87001	0.7149	1.05326	0.86033	0.74171
11	UBI	Left	0.96554	1.05286	0.45331	1.06201	0.79411	0.91286	1.06998	0.86191	1.04352	0.84061	0.11695	0.24379	1.01983	0.92805	0.83948	0.76789	0.67416	1.11643	1.20655	1.27658
12	UBI	Left	0.92243	0.99873	0.64325	0.86139	0.85316	1.01311	0.99044	1.03843	0.90721	0.9659		0.32216	1.00038	0.95658	0.67723	0.742	0.60813	1.14333	1.0304	0.84308
13	sham	Left	1.01429	0.91199	0.42316	0.82608	0.50873	0.66648	0.79444	0.72667	0.75424	0.58823	0.08228	0.17195	0.75336	0.64442	0.59173	0.56928	0.5034	0.66193	1.08518	0.62423
14	sham	Left	1.05415	0.82083	0.33028	0.6848	0.70456	0.74096	0.89147	0.75593	0.65332	0.67049	0.11077	0.20407	0.6702	0.61185	0.34447	0.48746	0.64273	0.82588	1.05415	0.61592
15	sham	Left	0.99515	1.15279	0.80531	0.94606	0.85847	0.75669	0.8428	0.58917	1.02556	1.00821	0.10741	0.32396	1.09452	0.93585	0.70057	0.67162	0.66815	0.78415	1.08408	0.86645
16	sham	Left	1.38148	1.10248	0.52661	0.64146	1.033	0.64673	0.75377	1.27534	0.83548	1.07344	0.18191	0.36635	0.76051	0.88417	0.40554	0.6187	0.53209	1.1717	0.85641	1.06889
17	sham	Left	1.11041	1.23557	0.72746	1.04146	0.9672	1.00071	0.97792	0.5255	0.97316	1.07264	0.09971	0.26027	1.18654	1.02952	0.8275	0.98649	0.6184	0.87248	1.10839	1.1028
18	sham	Left	1.14849	1.07991	1.16928	0.84529	0.86435	0.85453	0.8624	0.66905	0.86015	1.26277	0.2844	0.39099	0.76942	1.12634	0.73948	0.81923	0.61264	1.17944	0.85694	0.88324
19	sham	Left	1.31987	0.94428	0.46536	1.01498	1.06138	0.93025	0.83388	0.96377	0.73309	0.73258	0.09119	0.32032	0.76331	0.8988	0.68475	0.77246	0.72276	0.91351	1.24228	1.18509
20	sham	Left	0.72524	1.07392	1.31726	1.05692	0.76661	1.11842	1.11741	0.50977	0.86305	1.16268			0.79626	0.81605	0.74613	0.84313	0.72639	1.17044	0.99265	0.7263
21	sham	Left	1.05409	1.06389	0.42582	1.02321	0.90445	0.86925	0.96119	1.3271	0.95095	0.88325	0.10645	0.27569	0.89927	0.84668	0.74272	0.80206	0.69568	0.8976	0.50259	0.94011
22	sham	Left	1.26037	1.00157	0.58997	0.9099	1.11619	1.06368	1.13603	1.21567	0.75207	1.15534	0.15986	0.267	0.91165	1.02432	0.73801	0.79976	0.70427	1.38869	0.67404	1.24747
23	sham	Left	1.1995	1.13808	0.33709	0.97757	0.92649	0.88551	0.91586	1.16713	0.96781	1.14139	0.13445	0.22914	1.28632	0.93472	0.5845	0.87846	0.484	1.16035	0.99975	1.00246
1	UBI	Right	1.31045	0.78272	0.36577	0.6221	0.58514	0.34509	0.7197	2.89439	0.63234	0.84369	0.16166	0.34069	0.66253	0.56932	0.42622	0.54305	0.51797	1.09426	1.03458	0.87874
2	UBI	Right	1.04726	0.98644	0.36618	0.79003	0.46523	0.80324	0.86219	1.52155	0.86349	0.72998	0.16768	0.24169	0.75113	0.55849	0.59882	0.73947	0.18717	0.57026	1.17317	0.88932
3	UBI	Right	0.99808	0.73425	0.47331	0.53523	0.59774	0.69995	0.61991	1.08954	0.64383	0.57144	0.19226	0.18728	0.54437	0.67597	0.47186	0.52349	0.30763	0.62851	1.23433	0.77354
4	UBI	Right	0.85505	1.28269	0.49203	0.79188	0.81947	0.9152	0.83406	0.91719	1.00288	0.92003	0.1794	0.37315	0.84744	0.88823	0.46127	0.75281	0.45918	1.01489	0.8566	1.12465
5	UBI	Right	0.75612	0.95119	0.61055	0.66403	0.85744	0.90255	0.79962	0.86623	0.76468	1.11357	0.16797	0.26509	0.74742	0.97424	0.51264	0.72009	0.60138	0.89266	0.84295	0.78003
6	UBI	Right	0.82572	0.82762	0.7207	0.77499	0.90234	0.76704	0.80913	0.50104	0.93781	0.75706	0.23065	0.28396	0.98324	0.73152	0.50194	0.72433	0.81223	0.96142	1.12239	0.74887
7	UBI	Right	0.69133	1.06916	0.60571	0.87892	0.57956	1.05812	1.02912	0.51818	0.81416	0.89442	0.07262	0.17473	0.89264	0.97182	0.74028	0.99865	0.68975	0.90734	0.90942	0.85296
8	UBI	Right	0.92922	1.23868	0.68207	0.83337	1.22276	0.96239	0.83249	0.70658	1.17729	1.25399	0.10261	0.35749	1.26447	0.99836	0.52773	0.94158	0.59843	1.15059	1.00974	0.81675
9	UBI	Right	1.35588	1.05029	0.47766	0.01347	0.82782	0.82879	0.89375	0.89212	0.81025	0.95823	0.12619	0.35633	0.66141	0.8865	0.57318	0.71648	0.4983	0.90889	1.0169	0.97416
10	UBI	Right	0.88339	1.18486		0.77389	0.99102	1.11942	0.82026	1.33993	0.93437	0.89516	0.09477	0.26684	0.89562	0.97902	0.62447	0.75882	0.65624	1.13557	0.87299	0.81071
11	UBI	Right	1.27019	1.06967	0.5325	0.82733	0.93988	0.85177	0.92058	1.09963	0.75949	1.0354	0.1922	0.27175	0.79826	0.84758	0.64964	0.7031	0.5293	1.10757	1.11377	1.29723
12	UBI	Right	1.20329	1.07889		0.84469	0.88415	0.90338	0.74787	1.65515	0.81745	1.24704		0.51375	0.95211	0.74653	0.54515	0.62323	0.67555	1.09625	1.04227	1.3462
13	sham	Right	0.97681	1.21905	0.27071	0.76978	0.9295	0.86015	0.85841	1.40925	0.82207	1.05097	0.11807	0.30903	0.73692	0.90748	0.34534	0.56851	0.83858	1.26163	0.92612	0.77468
14	sham	Right	0.96595	0.9123	0.17868	0.84423	0.69109	0.73807	0.65403	0.93801	0.84521	1.12554	0.18427	0.22378	0.82174	0.58277	0.48229	0.50248	0.64327	1.02336	1.10102	0.83215
15	sham	Right	1.15192	1.42868	1.02104	1.0411	1.25013	0.98251	1.11321	0.94615	1.16683		0.17305	0.36445	1.39394	1.35448	0.57184	0.92853	0.86683	1.9061	0.95131	1.35521
16	sham	Right	1.44429	1.15941	0.43528	0.7714	1.10723	0.67399	0.59534	1.08938	0.78684	0.8762	0.14773	0.36254	0.76984	0.9066	0.42595	0.65105	0.58432	1.11652	1.06005	1.18398
17	sham	Right	1.80253	1.45573	0.77752	0.97424	1.24114	0.96585	1.00578	0.81094	1.21519		0.26797	0.45959	1.35902	1.22746	0.76464	1.1059	0.53526	1.59181	1.13651	2.04693
18	sham	Right	1.13985	1.17219	1.02509	0.97841	0.96291	0.92295	0.89813	0.59847	0.96312	1.11035	0.20082	0.26694	0.76627	0.99308	0.65737	0.88396	0.6517	1.06016	1.04348	1.03789
19	sham	Right	1.51943	1.04957	0.62303	0.6443	0.81116	0.72701	0.53969	1.12366	0.77083	1.1232	0.11676	0.35181	0.67336	1.14349	0.54221	0.75106	0.5655	1.15378	1.01211	1.24234
20	sham	Right	0.65016	1.3843	0.71247	0.69645	0.79541	0.74935	0.61217	0.57782	0.82832	0.8793			0.58717	0.67721	0.43599	0.6381	0.48074	0.86262	0.75481	0.68798
21	sham	Right	1.23062	1.20191	0.57805	0.78113	1.02462	0.90429	0.8382	2.05063	1.04787	1.38672	0.21404	0.301	0.89819	1.07246	0.50965	0.89423	0.41537	1.42396	0.85056	1.6047
22	sham	Right	1.42607	1.35319	0.37848	0.89926	1.34398	1.0235	0.82877	1.79366	0.99127	1.17068	0.23671	0.30193	0.96362	0.92845	0.43488	1.01242	0.43873	1.35288	1.04181	1.69395
23	sham	Right	1.08607	1.04889	0.45993	0.88925	0.81654	0.92305	1.24381	1.12249	1.02616	1.0175	0.11754	0.21235	0.97787	0.77933	0.58302	0.72092	0.53579	0.90761	0.85399	0.87891
