# Supplementary material for: Left-right side-specific endocrine signaling complements neural pathways to mediate acute asymmetric effects of brain injury
Source: eLife. 2021 Aug 10;10:e65247. doi: 10.7554/eLife.65247 (PMC8354641; doi:10.7554/eLife.65247)
Supplement: Figure 3—source data 2. [file elife-65247-fig3-data2.xlsx]

## Sheet: Figure 3_Source Data 2
Raw data for the levels of opioid peptides dynorphin B (DynB), Leu-enkephalin-Arg (LER) and Met-enkephalin-Arg-Pro (MEAP) in the lumbar domains of rats exposed to the left unilateral brain injury (UBI) or left sham surgery (Sh).
The peptide content is presented in fmol/mg tissue.
Rat ID	Operation type	Spinal cord side	DynB	LER	MEAP
1	UBI	Left	14.1953	15.2574	1589.34
2	UBI	Left	13.9666	16.3681	2090.07
3	UBI	Left	10.9373	18.543	1535.07
4	UBI	Left	12.8079	16.3125	1592.69
5	UBI	Left	11.5277	12.8633	1303.13
6	UBI	Left	11.4749	11.2186	2306.61
7	UBI	Left	15.7326	9.60041	2260.85
8	UBI	Left	7.75145	9.68712	1228.41
9	UBI	Left	13.0548	6.27929	2434.37
10	UBI	Left	8.69159	7.73224	1756.94
11	UBI	Left	10.1296	7.40195	1769.03
12	UBI	Left	10.8908	6.90216	1398.96
13	sham	Left	9.08037	13.847	1238.3
14	sham	Left	7.48174	11.4166	762.17
15	sham	Left	8.25336	11.5922	976.53
16	sham	Left	9.49282	5.63743	1146.5
17	sham	Left	8.82734	7.89152	1082.56
18	sham	Left	12.9715	6.71928	1544.97
19	sham	Left	9.93909	4.59167	1285.38
20	sham	Left	9.81096	5.52107	1344.24
21	sham	Left	9.1548	5.79048	1166.26
22	sham	Left	9.35313	6.10741	1255.37
23	sham	Left	12.1965	6.81764	1167.87
1	UBI	Right	15.2046	11.3419	1916.67
2	UBI	Right	8.22094	12.5373	1260.44
3	UBI	Right	13.0767	18.855	1325.18
4	UBI	Right	11.59	14.8576	1409.68
5	UBI	Right	12.6567	13.202	1784.5
6	UBI	Right	7.89751	10.0348	1503.17
7	UBI	Right	7.80718	7.66084	1469.19
8	UBI	Right	10.8946	17.3403	1065.16
9	UBI	Right	10.0078	4.92027	2194.47
10	UBI	Right	9.61833	10.6428	1774.35
11	UBI	Right	11.9159	6.72189	1944.54
12	UBI	Right	10.9362	4.39462	1799.1
13	sham	Right	9.45505	12.1576	942.453
14	sham	Right	13.215	18.3013	1203.8
15	sham	Right	7.09638	11.5451	1312.39
16	sham	Right	8.61477	11.5169	1102
17	sham	Right	13.4195	5.10743	1614.28
18	sham	Right	10.976	3.94243	1294.14
19	sham	Right	8.99225	5.37959	1178.63
20	sham	Right	8.4482	3.82947	1616.94
21	sham	Right	11.167	2.57463	1687.66
22	sham	Right	8.04522	3.86453	1011.11
23	sham	Right	11.757	3.74081	1273.7
