# Supplementary material for: Left-right side-specific endocrine signaling complements neural pathways to mediate acute asymmetric effects of brain injury
Source: eLife. 2021 Aug 10;10:e65247. doi: 10.7554/eLife.65247 (PMC8354641; doi:10.7554/eLife.65247)
Supplement: Figure 4—source data 1. [file elife-65247-fig4-data1.xlsx]

## Sheet: Exptl. design
Figure 4_Source data 1.
Neuroendocrine pathway mediating postural asymmetry formation in rats with transected spinal cord.
Figure 4A. HL-PA in hypophysectomized (HPT) and control rats with transected spinal cord 3 h after left UBI (L-UBI). Left sham surgery: L-Sham.
Figure 4B. HL-PA after intravenous administration of serum from rats with either left UBI (L-UBI serum) or left sham surgery (L-sham serum) to rats with transected spinal cord.
Figure 4C. Induction of HL-PA by Arg-vasopressin (AVP) and b-endorphin (End) in rats with transected spinal cord. The HL-PA was analyzed in prone position 60 min after the injection.
Figure 4D. Effect of naloxone or saline, and SSR-149415 (SSR) or vehicle on HL-PA 3 h after left UBI in rats with transected spinal cord.
Figure 4E. Effect of naloxone (saline), and SSR-149415 (SSR) (vehicle) on HL-PA 3 h after administration of serum from the left UBI rats, to animals with transected spinal cord.
Negative and positive HL-PA values are assigned to rats with the left and right hindlimb flexion, respectively.

## Sheet: Figure 4A
Rat No	Operation	Operation Side	HL-PA, mm; before UBI	HL-PA, mm; 3 h after UBI
13	Control	L-Sham	-0.416667	0.0833333
14	Control	L-Sham	-0.166667	0.166667
15	Control	L-Sham	-0.25	-0.583333
16	Control	L-Sham	0.166667	-0.166667
17	Control	L-Sham	0.166667	0.5
18	Control	L-Sham	-0.0833333	-0.0833333
19	Control	L-Sham	0.25	0.166667
20	Control	L-Sham	0.25	-0.25
1	Control	L-UBI	-0.416667	3.16667
2	Control	L-UBI	-0.0833333	3.16667
3	Control	L-UBI	-0.25	5.41667
4	Control	L-UBI	-0.166667	3.83333
5	Control	L-UBI	-0.333333	3.5
6	Control	L-UBI	-0.166667	4.83333
7	Control	L-UBI	0.333333	4.25
8	Control	L-UBI	0.25	4.08333
9	Control	L-UBI	0.166667	3.83333
10	Control	L-UBI	-0.0833333	4.58333
11	Control	L-UBI	-0.0833333	4.33333
12	Control	L-UBI	0.166667	5.41667
2224_02	HPT	L-UBI	0.583333	-0.0833333
2225_01	HPT	L-UBI	0.416667	1.66667
2225_02	HPT	L-UBI	-0.166667	-0.416667
2226_01	HPT	L-UBI	-0.666667	-0.166667
2226_02	HPT	L-UBI	0.0833333	0.333333
2227_02	HPT	L-UBI	0	0.0833333
2228_01	HPT	L-UBI	-0.0833333	-0.166667
2228_02	HPT	L-UBI	0.25	-0.0833333
									Rat I.D.	pre-surgery	30 min	1 hour	3 hours

## Sheet: Figure 4B
Rat No	Serum	HL-PA, mm; 3 h after injection
2	L-sham serum	0.08
5	L-sham serum	-0.08
7	L-sham serum	0.17
12	L-sham serum	0
14	L-sham serum	0.08
17	L-sham serum	-0.17
24	L-sham serum	-0.17
8	L-UBI serum	-2.25
13	L-UBI serum	2.58
15	L-UBI serum	2.08
16	L-UBI serum	2.92
19	L-UBI serum	1.83
20	L-UBI serum	3.33
21	L-UBI serum	2.17
38	L-UBI serum	2.92
41	L-UBI serum	3.75
48	L-UBI serum	3.67
52	L-UBI serum	9.5
69	L-UBI serum	7.75
70	L-UBI serum	9.33

## Sheet: Figure 4C
Rat No	Treatment	HL-PA, mm; before injection	HL-PA, mm; 1 h after injection
51	Saline	0.25	-0.0833333
55	Saline	-0.0833333	-0.166667
62	Saline	0	-0.0833333
65	Saline	0.166667	-0.166667
4	AVP	-0.0833333	4.08333
63	AVP	0	3.41667
N64	AVP	-0.583333	1.41667
N65	AVP	0.25	0.916667
N68	AVP	-1.08333	1.58333
N70	AVP	-0.666667	2.58333
N71	AVP	-0.0833333	2.66667
56	End	-0.08	3.17
61	End	0	3.83
64	End	0.08	4.58
66	End	0	4.08
67	End	0.25	4.75
71	End	0	3.17
72	End	0.17	3.42
73	End	-0.17	5.25

## Sheet: Figure 4D
Rat No	Operation	Treatment	HL-PA, mm; before injection	HL-PA, mm; 1 h after injection
7	L-UBI	Saline	0.0833333	3.33333
8	L-UBI	Saline	-0.583333	2.75
9	L-UBI	Saline	-0.333333	3.08333
10	L-UBI	Saline	0	6.41667
11	L-UBI	Saline	0.0833333	4.33333
12	L-UBI	Saline	-0.0833333	4.16667
1	L-UBI	Naloxone	0.166667	0.333333
2	L-UBI	Naloxone	-0.25	-0.5
3	L-UBI	Naloxone	0	0.916667
4	L-UBI	Naloxone	-0.5	1.08333
5	L-UBI	Naloxone	0.0833333	0.333333
6	L-UBI	Naloxone	-0.0833333	1.08333
19	L-UBI	Vehicle	0.416667	3.91667
20	L-UBI	Vehicle	-0.0833333	4.33333
21	L-UBI	Vehicle	0	5.5
22	L-UBI	Vehicle	0	4.16667
23	L-UBI	Vehicle	0.0833333	4.25
13	L-UBI	SSR	0	0.5
14	L-UBI	SSR	0	0.333333
15	L-UBI	SSR	0.666667	-0.166667
16	L-UBI	SSR	0.5	-0.0833333
17	L-UBI	SSR	0.166667	-0.0833333
18	L-UBI	SSR	0.25	0.0833333

## Sheet: Figure 4E 
Rat No	Serum	Treatment	HL-PA, mm; before injection	HL-PA, mm; 1 h after injection
57	L-UBI	Saline	-0.08	3.33
58	L-UBI	Saline	0.08	3.83
59	L-UBI	Saline	0.08	4.17
60	L-UBI	Vehicle	-0.17	4.83
61	L-UBI	Vehicle	0.08	5.42
62	L-UBI	Vehicle	0.17	5.08
6	L-UBI	SSR	0.17	0.17
9	L-UBI	SSR	-0.17	0.17
11	L-UBI	SSR	0.08	0
22	L-UBI	SSR	0.08	0.08
23	L-UBI	SSR	0	0
25	L-UBI	SSR	0	0.17
37	L-UBI	Naloxone	0.166667	1.08333
43	L-UBI	Naloxone	-0.166667	-0.0833333
49	L-UBI	Naloxone	0.166667	-0.0833333
50	L-UBI	Naloxone	0.25	0.583333
48	L-UBI	Naloxone	0.166667	0.75
68	L-UBI	Naloxone	0.0833333	0.833333
